# Supplementary material for: The carbon emissions of Chinese cities
Source: Copernicus journal article supplement (doi:10.5194/acp-12-6197-2012), 2012-07-18
Supplement: Supplementary file 1 [file acp-12-6197-2012-supplement.pdf]

**Supporting information for**

# The Carbon Emissions of Chinese Cities

Haikun Wang <sup>a,b</sup>, Rongrong Zhang <sup>a</sup>, Miaomiao Liu <sup>a</sup>, Jun Bi <sup>a,b,\*</sup>

<sup>a</sup> State Key Laboratory of Pollution Control and Resource Reuse, School of the Environment, Nanjing University, Nanjing 210046, P.R. China

<sup>b</sup> Institute for Climate and Global Change Research, Nanjing University, Nanjing 210046, PR China

\*Corresponding author Tel/fax: +86-25-89680566; E-mail: jbi@nju.edu.cn (Dr. Jun Bi) or wanghk@nju.edu.cn (Dr. Haikun Wang)

Number of pages: 9

Number of tables: 3

Number of figures: 4

**Table S1**

**Definition and characteristics of the twelve Chinese cities and ten cities in the world in year 2005 of this study**

| City                     | Population<br>(thousand<br>persons) | Total<br>area<br>(km <sup>2</sup> ) | GDP<br>(million<br>PPP \$U.S.) | Population<br>density<br>(persons/km <sup>2</sup> ) | Per capita<br>income (PPP<br>\$U.S.) |
|--------------------------|-------------------------------------|-------------------------------------|--------------------------------|-----------------------------------------------------|--------------------------------------|
| Beijing                  | 15,380                              | 16,411                              | 199,700                        | 937                                                 | 5,174                                |
| Tianjin                  | 10,430                              | 11,919                              | 107,200                        | 875                                                 | 3,193                                |
| Shanghai                 | 17,780                              | 6,341                               | 265,500                        | 2,804                                               | 7,737                                |
| Hangzhou                 | 6,600                               | 16,596                              | 85,400                         | 398                                                 | 4,024                                |
| Nanjing                  | 6,890                               | 6,582                               | 69,900                         | 1,047                                               | 3,673                                |
| Wuxi                     | 4,500                               | 4,788                               | 81,400                         | 940                                                 | 4,018                                |
| Guangzhou                | 7,500                               | 7,434                               | 149,500                        | 1,009                                               | 5,026                                |
| Zhengzhou                | 7,160                               | 7,446                               | 48,200                         | 962                                                 | 2,786                                |
| Wuhan                    | 8,010                               | 8,494                               | 64,900                         | 943                                                 | 2,785                                |
| Chongqing                | 27,980                              | 82,400                              | 89,100                         | 340                                                 | 2,199                                |
| Lanzhou                  | 3,117                               | 13,086                              | 16,400                         | 238                                                 | 2,310                                |
| Shenyang                 | 6,986                               | 12,980                              | 60,400                         | 538                                                 | 2,853                                |
| Bangkok (city)           | 5,660                               | 1,569                               | unknown                        | 3,607                                               | 7,560                                |
| Barcelona (city)         | 1,610                               | 100                                 | unknown                        | 16,056                                              | 27,403                               |
| Cape Town (city)         | 3,500                               | 2,454                               | unknown                        | 1,425                                               | 9,035                                |
| Denver (city and county) | 580                                 | 397                                 | unknown                        | 1,460                                               | 42,476                               |
| Geneva (canton)          | 430                                 | 282                                 | unknown                        | 1,532                                               | 32,110                               |
| London (GLA)             | 7,360                               | 1,579                               | unknown                        | 4,664                                               | 38,066                               |
| Los Angeles (county)     | 9,520                               | 10,518                              | unknown                        | 905                                                 | 31,049                               |
| New York City            | 8,170                               | 789                                 | unknown                        | 10,355                                              | 46,221                               |
| Prague (GPR)             | 1,180                               | 496                                 | unknown                        | 2,382                                               | 21,595                               |
| Toronto (GTA)            | 5,560                               | 7,195                               | unknown                        | 772                                                 | 33,529                               |

**Note:**

1. The data of twelve Chinese cities are all from the local statistical materials (1-12).
2. GDP and Per capita income are converted to PPP \$U.S. based on the *implied PPP conversion rate national currency per current international dollar* from <http://www.econstats.com/weo/V013.htm>
3. The data of ten cities in the world are derived from Kenney et al's study (13).
4. GLA, GPR and GTA mean Great London Authority, Great Prague and Great Toronto, respectively.

**Table S2**

**Carbon accounting scope of this study**

| <b>WRI/WBCSD</b> | <b>Spatial boundary</b>                                                                     | <b>Life-cycle perspective</b> | <b>Components</b>                                                                                                                                                                                                                                                                  | <b>Measure</b>              |
|------------------|---------------------------------------------------------------------------------------------|-------------------------------|------------------------------------------------------------------------------------------------------------------------------------------------------------------------------------------------------------------------------------------------------------------------------------|-----------------------------|
| Scope 3          | Out of boundary energy use (and further out of boundary emissions, not included in Scope 2) | Production chain emissions    | *Embodied emissions from food and materials consumed in cities<br>*Emissions upstream of electric power plants<br>*Upstream emissions from fossil fuel use<br>*Combustion of aviation and marine fuels                                                                             | ICLEI and <b>This Study</b> |
|                  |                                                                                             | Single process emissions      | *Out of boundary waste (landfill) emissions<br>*Out of boundary district heating emissions                                                                                                                                                                                         |                             |
| Scope 2          | In boundary electricity use related emissions                                               |                               | *Out of boundary electricity emissions at power plant                                                                                                                                                                                                                              |                             |
| Scope 1          | In boundary emissions                                                                       | Single process emissions      | *In boundary fossil fuel combustion ( <u>including industrial, transportation, household and commercial energy used</u> )<br>*In boundary waste (landfill) emissions<br>*In boundary industrial processes and product use<br>*In boundary agriculture, forestry and other land use | IPCC                        |

**Table S3****Carbon emission factors of six major power grids from 2004 to 2008, t CO<sub>2</sub>/million KWh**

| <b>Grid name</b> | <b>Covered cities</b>             | <b>2004</b> | <b>2005</b> | <b>2006</b> | <b>2007</b> | <b>2008</b> |
|------------------|-----------------------------------|-------------|-------------|-------------|-------------|-------------|
| Northeast China  | Shenyang                          | 940         | 956         | 980         | 905         | 871         |
| North China      | Beijing, Tianjin                  | 913         | 927         | 892         | 867         | 874         |
| Central China    | Zhengzhou, Wuhan, Chongqing       | 724         | 697         | 681         | 659         | 555         |
| East China       | Shanghai, Hangzhou, Nanjing, Wuxi | 741         | 764         | 743         | 720         | 688         |
| Northwest China  | Lanzhou                           | 695         | 704         | 699         | 691         | 701         |
| South China      | Guangzhou                         | 631         | 668         | 667         | 641         | 552         |

**Note:**

1. The emission factors in 2004 are the average of 2003 and 2005.

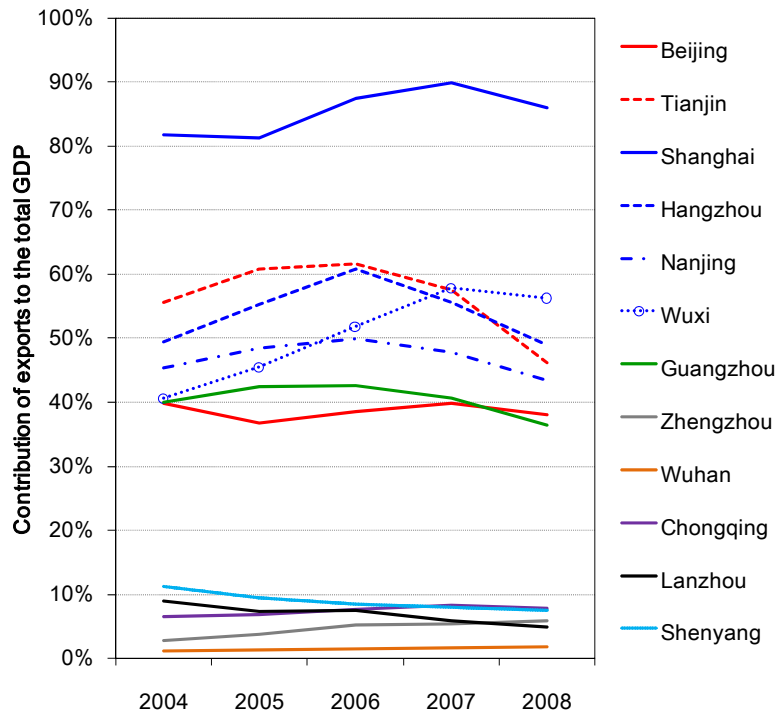

(a)

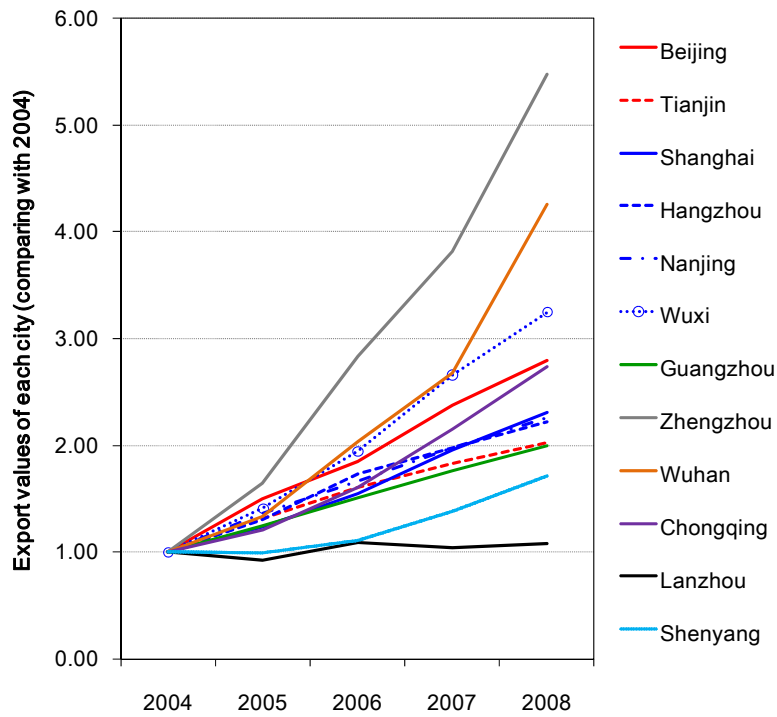

(b)

Fig. S1. Export values and the contributions to the total GDP of each Chinese city.

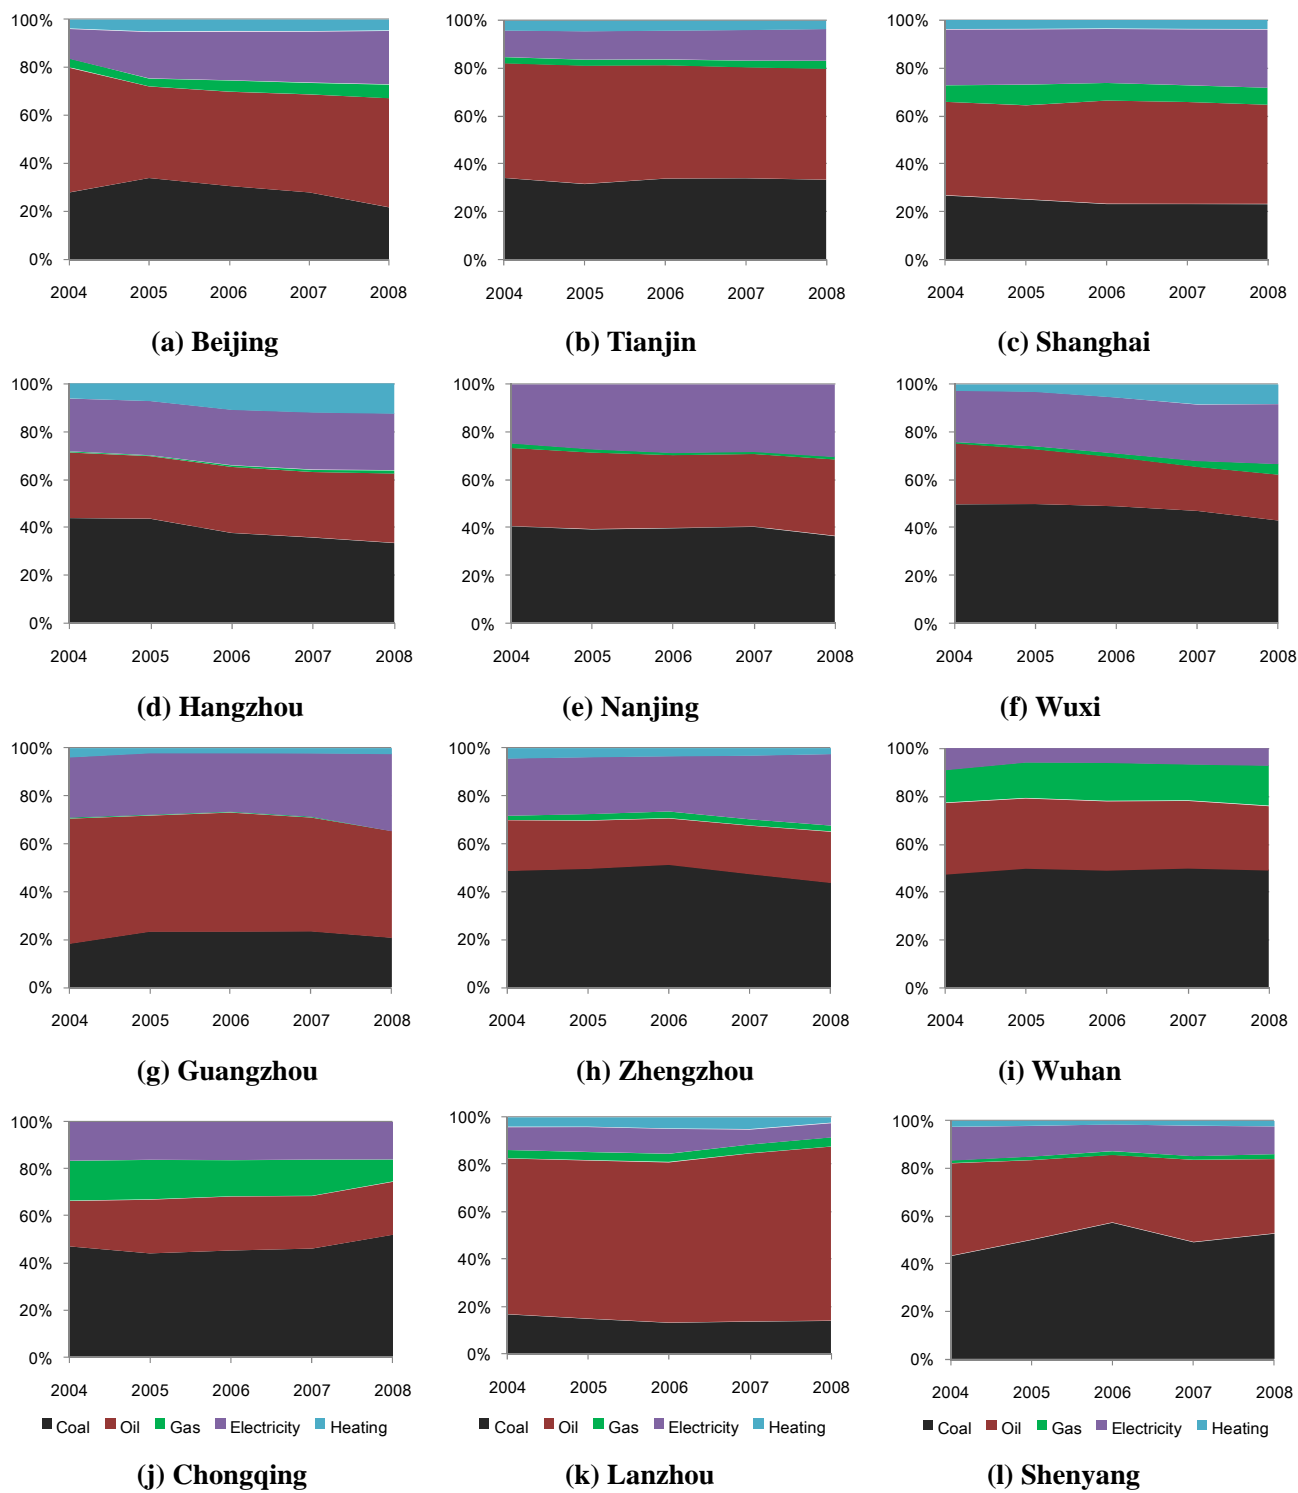

**Fig. S2. Energy structures of the 12 Chinese cities from 2004 to 2008.**

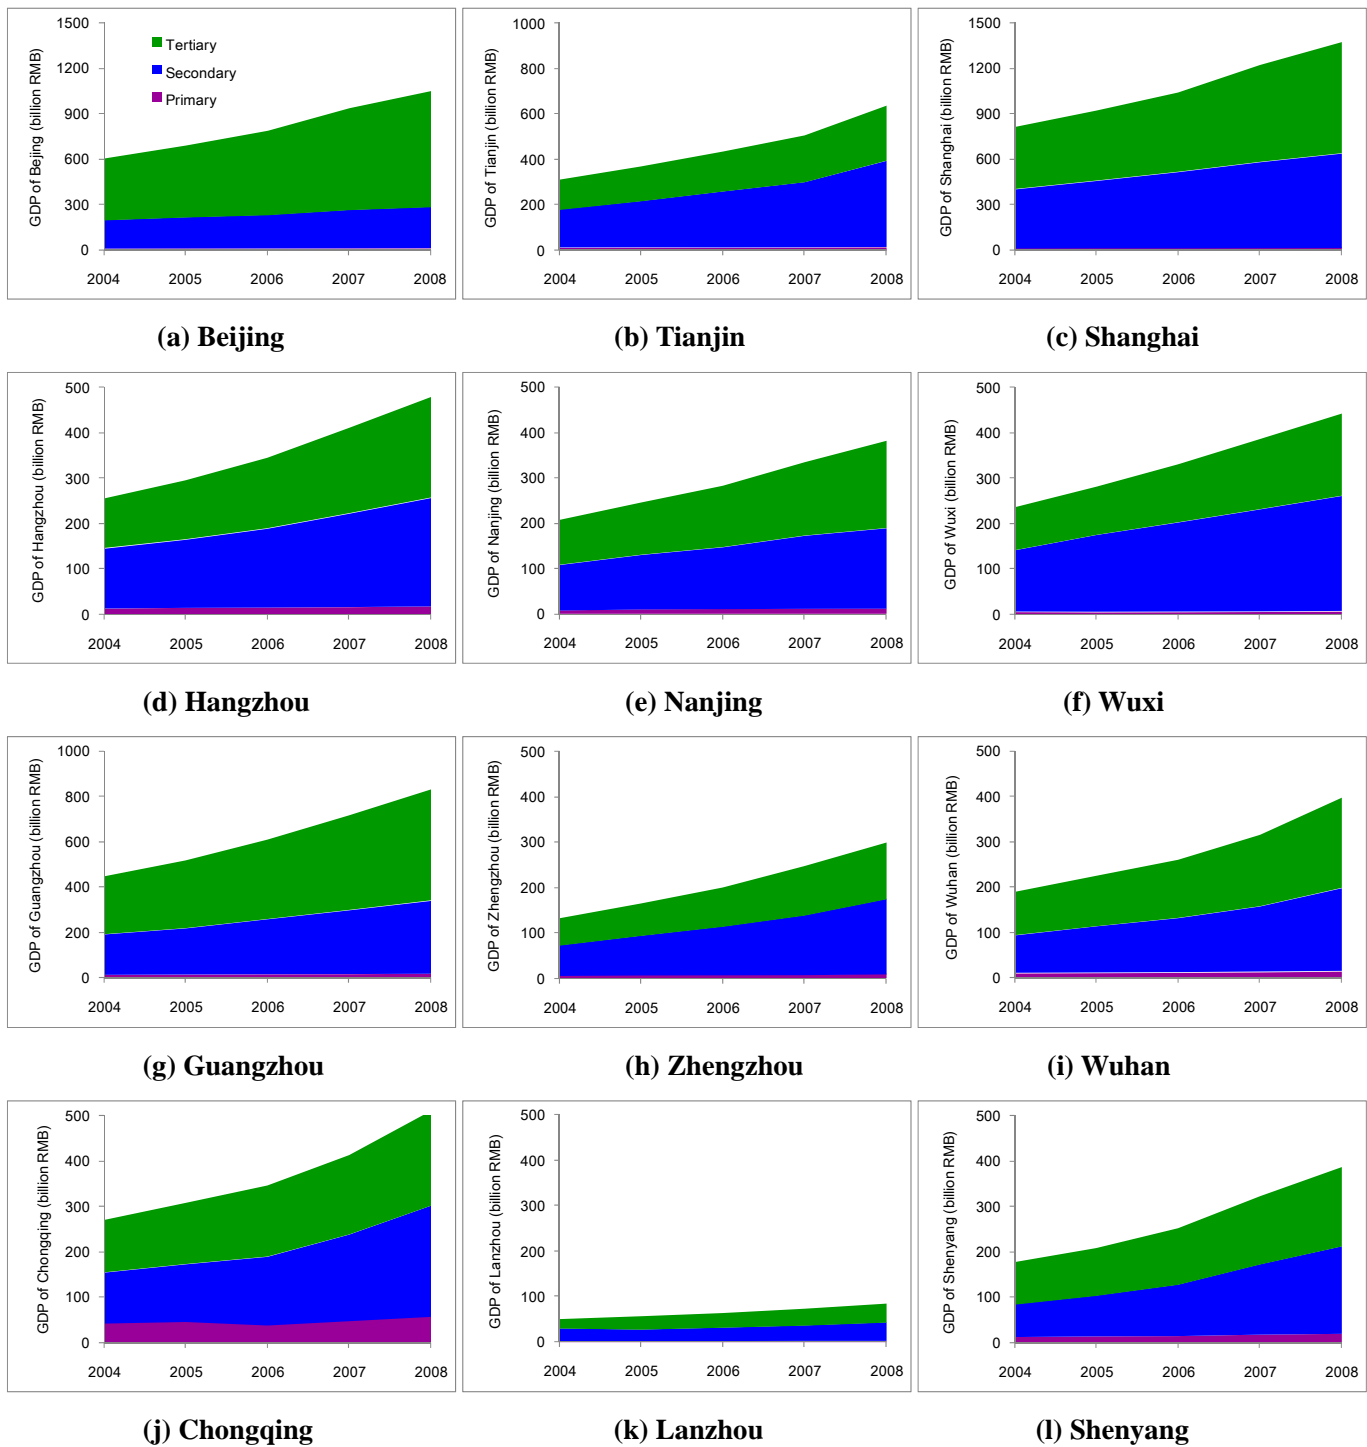

**Fig. S3. Economic developments and structures of the 12 Chinese cities from 2004 to 2008.** (Note: Primary industry includes agriculture, forestry, animal husbandry and fishery. Secondary industry includes industry (mining, manufacturing and production and supply of electricity, gas and water) and construction. The other economic sectors are included in tertiary industry (e.g. transport, education, Leasing and Business Services, and etc))

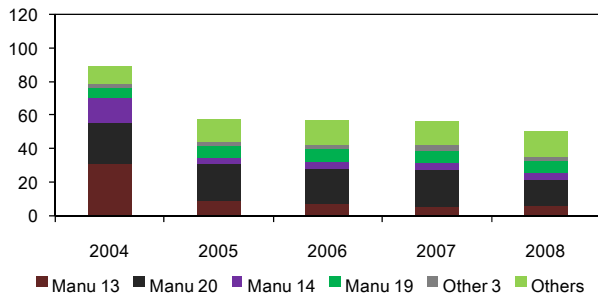

(a) Beijing

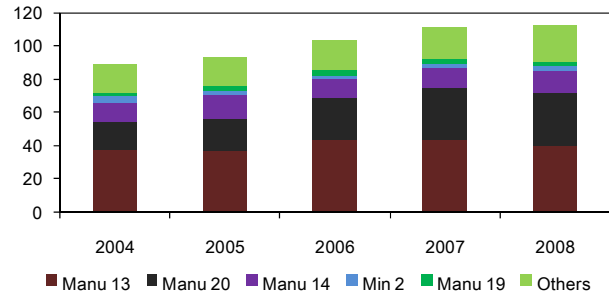

(b) Tianjin

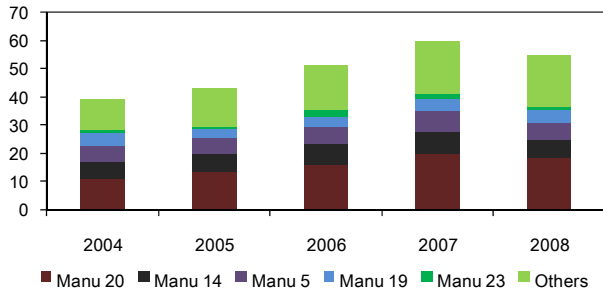

(c) Wuxi

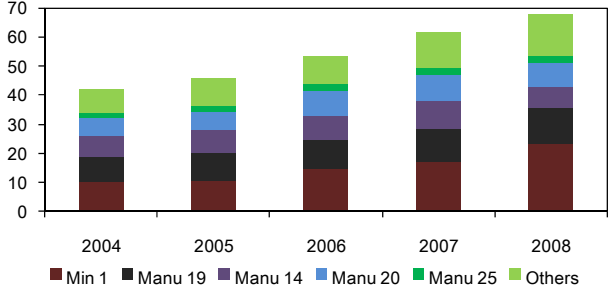

(d) Chongqing

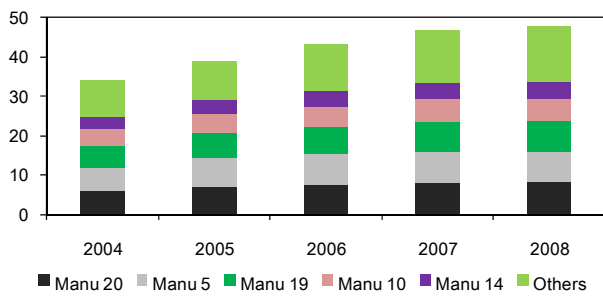

(e) Hangzhou

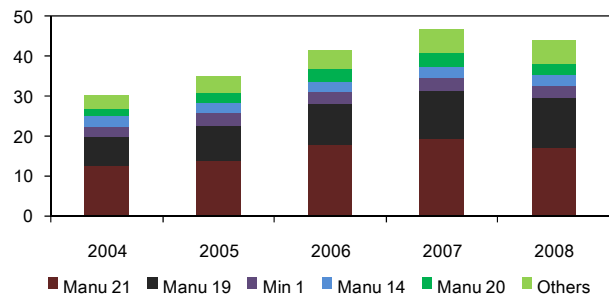

(f) Zhengzhou

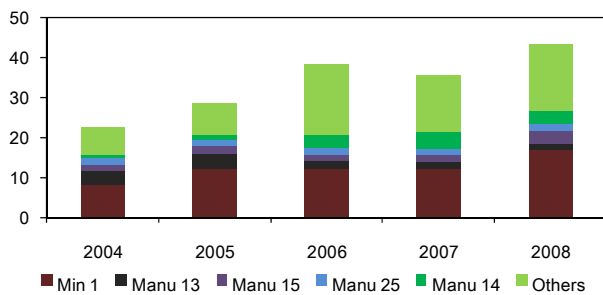

(g) Shenyang

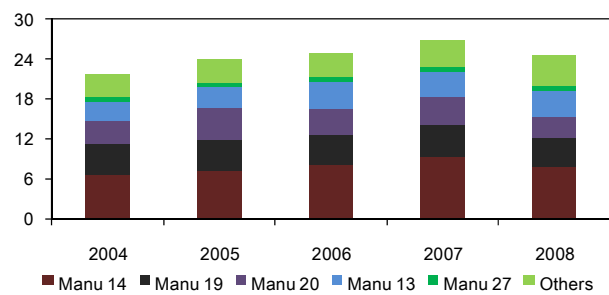

(h) Nanjing

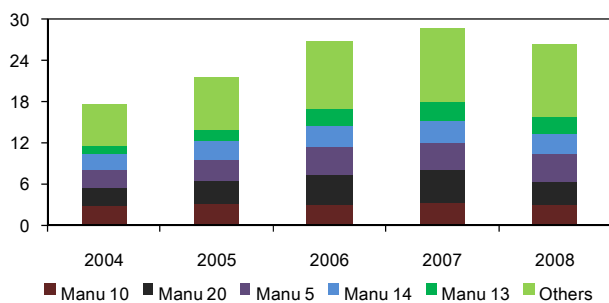

(i) Guangzhou

**Fig. S4. Carbon emission structures of industrial energy consumptions for the cities in China, million tons. (The abbreviations of each industrial subsector are shown in the following table)**



|         |                                                                                          |
|---------|------------------------------------------------------------------------------------------|
| Min 1   | Mining and Washing of Coal                                                               |
| Min 2   | Extraction of Petroleum and Natural Gas                                                  |
| Min 3   | Mining and Processing of Ferrous Metal Ores                                              |
| Min 4   | Mining and Processing of Non-Ferrous Metal Ores                                          |
| Min 5   | Mining and Processing of Non-metal Ores                                                  |
| Min 6   | Mining of Other Ores                                                                     |
| Manu 1  | Processing of Food from Agricultural Products                                            |
| Manu 2  | Manufacture of Foods                                                                     |
| Manu 3  | Manufacture of Beverages                                                                 |
| Manu 4  | Manufacture of Tobacco                                                                   |
| Manu 5  | Manufacture of Textile                                                                   |
| Manu 6  | Manufacture of Textile Wearing Apparel, Footware and Caps                                |
| Manu 7  | Manufacture of Leather, Fur, Feather and Related Products                                |
| Manu 8  | Processing of Timber, Manufacture of Wood, Bamboo, Rattan, Palm, and Straw Products      |
| Manu 9  | Manufacture of Furniture                                                                 |
| Manu 10 | Manufacture of Paper and Paper Products                                                  |
| Manu 11 | Printing, Reproduction of Recording Media                                                |
| Manu 12 | Manufacture of Articles For Culture, Education and Sport Activities                      |
| Manu 13 | Processing of Petroleum, Coking, Processing of Nuclear Fuel                              |
| Manu 14 | Manufacture of Raw Chemical Materials and Chemical Products                              |
| Manu 15 | Manufacture of Medicines                                                                 |
| Manu 16 | Manufacture of Chemical Fibres                                                           |
| Manu 17 | Manufacture of Rubber                                                                    |
| Manu 18 | Manufacture of Plastics                                                                  |
| Manu 19 | Manufacture of Non-metallic Mineral Products                                             |
| Manu 20 | Smelting and Pressing of Ferrous Metals                                                  |
| Manu 21 | Smelting and Pressing of Non-ferrous Metals                                              |
| Manu 22 | Manufacture of Metal Products                                                            |
| Manu 23 | Manufacture of General Purpose Machinery                                                 |
| Manu 24 | Manufacture of Special Purpose Machinery                                                 |
| Manu 25 | Manufacture of Transport Equipment                                                       |
| Manu 26 | Manufacture of Electrical Machinery and Equipment                                        |
| Manu 27 | Manufacture of Communication Equipment, Computers and Other Electronic Equipment         |
| Manu 28 | Manufacture of Measuring Instruments and Machinery for Cultural Activity and Office Work |
| Manu 29 | Manufacture of Artwork and Other Manufacturing                                           |
| Manu 30 | Recycling and Disposal of Waste                                                          |
| Other 1 | Production and Supply of Gas                                                             |
| Other 2 | Production and Supply of Water                                                           |
| Other 3 | Construction                                                                             |

## References

- [1] Beijing Municipal Statistics Bureau (BMSB). 2005-2009. Beijing Statistical Yearbook 2004-2008; China Statistics Press: Beijing, China.
- [2] Chongqing Municipal Statistics Bureau (CMSB). 2005-2009. Chongqing Statistical Yearbook 2004-2008; China Statistics Press: Beijing, China.
- [3] Guangzhou Municipal Statistics Bureau (GMSB). 2005-2009. Guangzhou Statistical Yearbook 2004-2008; China Statistics Press: Beijing, China.
- [4] Hangzhou Municipal Statistics Bureau (HMSB). 2005-2009. Hangzhou Statistical Yearbook 2004-2008; China Statistics Press: Beijing, China.
- [5] Lanzhou Municipal Statistics Bureau (LMSB). 2005-2009. Lanzhou Statistical Yearbook 2004-2008; China Statistics Press: Beijing, China.
- [6] Nanjing Municipal Statistics Bureau (NMSB). 2005-2009. Nanjing Statistical Yearbook 2004-2008; China Statistics Press: Beijing, China.
- [7] Shanghai Municipal Statistics Bureau (SMSB). 2005-2009 a. Shanghai Statistical Yearbook 2004-2008; China Statistics Press: Beijing, China.
- [8] Shenyang Municipal Statistics Bureau (SMSB). 2005-2009 b. Shenyang Statistical Yearbook 2004-2008; China Statistics Press: Beijing, China.
- [9] Tianjin Municipal Statistics Bureau (TMSB). 2005-2009. Tianjin Statistical Yearbook 2004-2008; China Statistics Press: Beijing, China.
- [10] Wuhan Municipal Statistics Bureau (WMSB). 2005-2009 a. Wuhan Statistical Yearbook 2004-2008; China Statistics Press: Beijing, China.
- [11] Wuxi Municipal Statistics Bureau (WMSB). 2005-2009 b. Wuxi Statistical Yearbook 2004-2008; China Statistics Press: Beijing, China.
- [12] Zhengzhou Municipal Statistics Bureau (ZMSB). 2005-2009. Zhengzhou Statistical Yearbook 2004-2008; China Statistics Press: Beijing, China.
- [13] Kennedy, C.; Steinberger, J.; Casson, B.; Hansen, Y.; Hillman, T.; Havránek, M.; Pataki, D.; Phdungsilp, A.; Ramaswami, A.; Mendez, G. Greenhouse gas emissions from global cities. *Environ. Sci. Technol.* 2009, 43, 7297-7302
- [14] BP Global, 2010. BP Statistical Review of World Energy. Available at <<http://www.bp.com/statisticalreview>>.
